# Supplementary material for: Potential Human Health Hazard of Post-Hurricane Harvey Sediments in Galveston Bay and Houston Ship Channel: A Case Study of Using In Vitro Bioactivity Data to Inform Risk Management Decisions
Source: MDPI journal article supplement (doi:10.3390/ijerph182413378), 2021-12-19
Supplement: s1 [file s1]

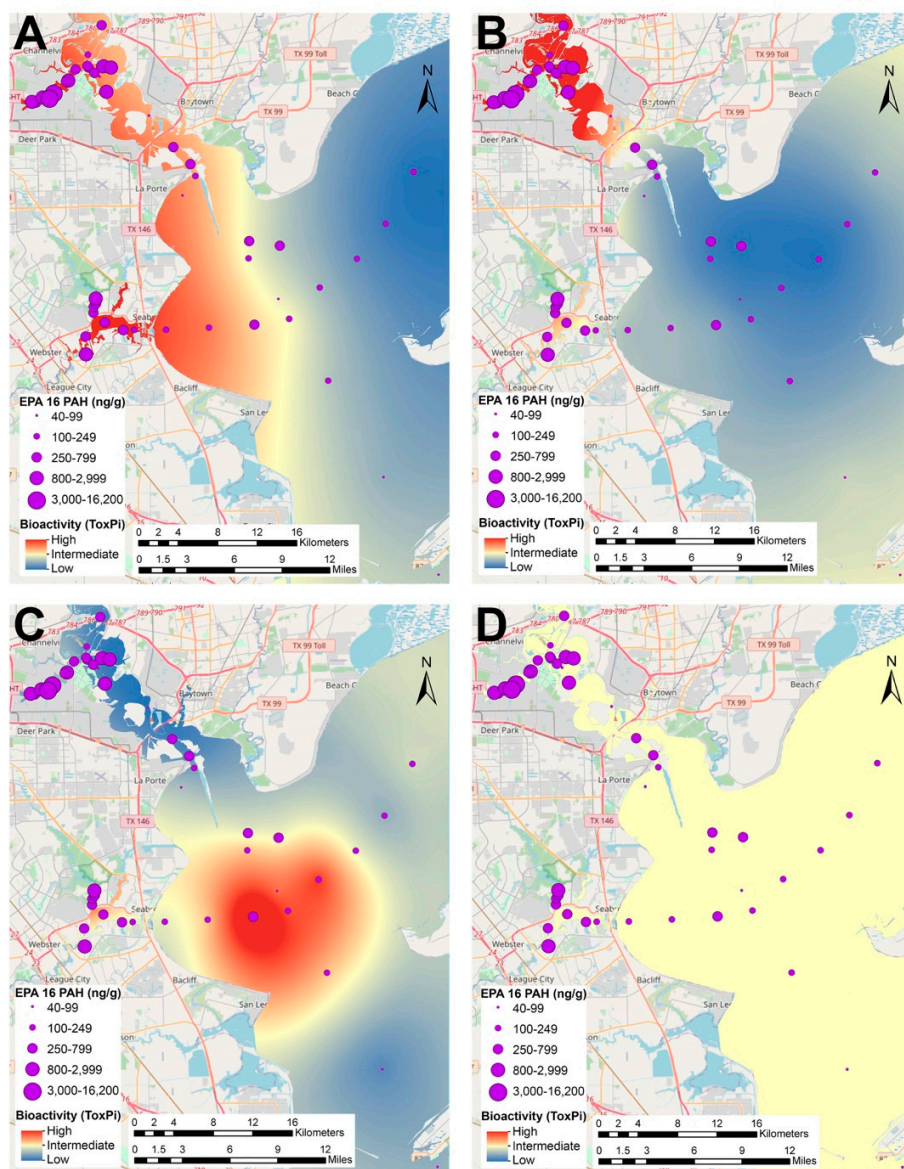

**Supplementary Figure S1.** Spatial patterns in bioactivity for samples based on the phenotypes from iCell Hepatocytes (A), iCell Neurons (B), iCell Endothelial cells (C), and HUVECs. ToxPi values for each cell type were used to create the map that visualizes (D) bioactivity as a color gradient (red=highest, blue=lowest; see the legend inset for color gradient). Sampling locations are identified as purple dots and the cumulative concentration of 16 EPA priority PAH were used to scale each dot.
