# Supplementary material for: Potential Human Health Hazard of Post-Hurricane Harvey Sediments in Galveston Bay and Houston Ship Channel: A Case Study of Using In Vitro Bioactivity Data to Inform Risk Management Decisions
Source: Int J Environ Res Public Health. 2021 Dec 19;18(24):13378. doi: 10.3390/ijerph182413378 (PMC8702027; doi:10.3390/ijerph182413378)
Supplement: Supplementary file 1 [file ijerph-18-13378-s001.zip]

Archive with 4 entries (4 files):
- Supplementary Figure S1. Mapping based on bioactivities.pdf
- Supplementary File 1. Recreator_chem_rsl.xlsx
- Supplementary File 2. Resident_chem_rsl.xlsx
- Supplementary File 3. Sediment sample ToxPi scores.xlsx
