# Supplementary material for: Potential Human Health Hazard of Post-Hurricane Harvey Sediments in Galveston Bay and Houston Ship Channel: A Case Study of Using In Vitro Bioactivity Data to Inform Risk Management Decisions
Source: Int J Environ Res Public Health. 2021 Dec 19;18(24):13378. doi: 10.3390/ijerph182413378 (PMC8702027; doi:10.3390/ijerph182413378)
Supplement: Supplementary file 1 [file ijerph-18-13378-s001.zip › Supplementary File 1. Recreator_chem_rsl.xlsx]

## Sheet: Soil Inputs
Variable	Recreated Soil Default Value	Form-input Value
A (PEF Dispersion Constant)	16.2302	16.2302
A (VF Dispersion Constant)	11.911	11.911
A (VF Dispersion Constant - mass limit)	11.911	11.911
B (PEF Dispersion Constant)	18.7762	18.7762
B (VF Dispersion Constant)	18.4385	18.4385
B (VF Dispersion Constant - mass limit)	18.4385	18.4385
City (PEF Climate Zone) Selection	Default	Default
City (VF Climate Zone) Selection	Default	Default
C (PEF Dispersion Constant)	216.108	216.108
C (VF Dispersion Constant)	209.785	209.785
C (VF Dispersion Constant - mass limit)	209.785	209.785
foc (fraction organic carbon in soil) g/g	0.006	0.006
F(x) (function dependent on Um/Ut) unitless	0.194	0.194
n (total soil porosity) Lpore/Lsoil	0.43396	0.43396
pb (dry soil bulk density) g/cm3	1.5	1.5
pb (dry soil bulk density - mass limit) g/cm3	1.5	1.5
PEF (particulate emission factor) m3/kg	1359344438	1359344438
ps (soil particle density) g/cm3	2.65	2.65
Q/Cwind (g/m2-s per kg/m3)	93.77	93.77
Q/Cvol (g/m2-s per kg/m3)	68.18	68.18
Q/Cvol (g/m2-s per kg/m3 - mass limit)	68.18	68.18
As (PEF acres)	0.5	0.5
As (VF acres)	0.5	0.5
As (VF mass-limit acres)	0.5	0.5
AF0-2 (skin adherence factor) mg/cm2	0.2	0.2
AF2-6 (skin adherence factor) mg/cm2	0.2	0.2
AF6-16 (skin adherence factor) mg/cm2	0.07	0.07
AF16-30 (skin adherence factor) mg/cm2	0.07	0.07
AFrec-a (skin adherence factor - adult) mg/cm2	0.07	0.07
AFrec-c (skin adherence factor - child) mg/cm2	0.2	0.2
ATrec (averaging time)	365	365
BW0-2 (body weight) kg	15	15
BW2-6 (body weight) kg	15	15
BW6-16 (body weight) kg	80	80
BW16-30 (body weight) kg	80	80
BWrec-a (body weight - adult) kg	80	80
BWrec-c (body weight - child) kg	15	15
DFSrec-adj (age-adjusted soil dermal factor) mg/kg	0	1477
DFSMrec-adj (mutagenic age-adjusted soil dermal factor) mg/kg	0	6118
EDrec (exposure duration - recreator) years	26	26
ED0-2 (exposure duration) year	2	2
ED2-6 (exposure duration) year	4	4
ED6-16 (exposure duration) year	10	10
ED16-30 (exposure duration) year	10	10
EDrec-c (exposure duration - child) years	6	6
EFrec (exposure frequency) days/year	0	5
EF0-2 (exposure frequency) days/year	0	5
EF2-6 (exposure frequency) days/year	0	5
EF6-16 (exposure frequency) days/year	0	5
EF16-30 (exposure frequency) days/year	0	5
EFrec-a (exposure frequency - adult) days/year	0	5
EFrec-c (exposure frequency - child) days/year	0	5
ETrec (exposure time - recreator) hours/day	0	6
ET0-2 (exposure time) hours/day	0	6
ET2-6 (exposure time) hours/day	0	6
ET6-16 (exposure time) hours/day	0	6
ET16-30 (exposure time) hours/day	0	6
ETrec-a (adult exposure time) hours/day	0	6
ETrec-c (child exposure time) hours/day	0	6
THQ (target hazard quotient) unitless	0.1	1
IFSrec-adj (age-adjusted soil ingestion factor) mg/kg	0	525
IFSMrec-adj (mutagenic age-adjusted soil ingestion factor) mg/kg	0	2383.33
IRS0-2 (soil intake rate) mg/day	200	200
IRS2-6 (soil intake rate) mg/day	200	200
IRS6-16 (soil intake rate) mg/day	100	100
IRS16-30 (soil intake rate) mg/day	100	100
IRSrec-a (soil intake rate - adult) mg/day	100	100
IRSrec-c (soil intake rate - child) mg/day	200	200
LT (lifetime - recreator) years	70	70
SA0-2 (skin surface area) cm2/day	2373	2373
SA2-6 (skin surface area) cm2/day	2373	2373
SA6-16 (skin surface area) cm2/day	6032	6032
SA16-30 (skin surface area) cm2/day	6032	6032
SArec-a (skin surface area - adult) cm2/day	6032	6032
SArec-c (skin surface area - child) cm2/day	2373	2373
TR (target risk) unitless	1e-06	1e-06
Tw (groundwater temperature) Celsius	25	25
Thetaa (air-filled soil porosity) Lair/Lsoil	0.28396	0.28396
Thetaw (water-filled soil porosity) Lwater/Lsoil	0.15	0.15
T (exposure interval) s	819936000	819936000
T (exposure interval) yr	26	26
Um (mean annual wind speed) m/s	4.69	4.69
Ut (equivalent threshold value)	11.32	11.32
V (fraction of vegetative cover) unitless	0.5	0.5

## Sheet: Soil RSL
Site-specific
Recreator Regional Screening Levels (RSL) for Soil
Key: I = IRIS; P = PPRTV; O = OPP; A = ATSDR; C = Cal EPA; X = PPRTV Screening Level; H = HEAST; D = DWSHA; W = TEF applied; E = RPF applied; G = see user's guide; U = user provided; ca = cancer; nc = noncancer; * = where: nc SL < 100X ca SL; ** = where nc SL < 10X ca SL; SSL values are based on DAF=1; max = ceiling limit exceeded; sat = Csat exceeded.
Chemical	CAS Number	Mutagen?	Volatile?	Chemical Type	SFo(mg/kg-day)-1	SFoRef	IUR (ug/m3)-1	IUR Ref	RfD (mg/kg-day)	RfD Ref	RfC (mg/m3)	RfC Ref	GIABS	ABS	RBA	Soil Saturation Concentration (mg/kg)	S (mg/L)	Koc (cm3/g)	Kd (cm3/g)	HLC (atm-m3/mole)	Henry's Law Constant Used in Calcs (unitless)	H` and HLC Ref	Normal Boiling Point BP (K)	BP Ref	Critical Temperature TC (K)	TC Ref	Chemical Type	Dia (cm2/s)	Diw (cm2/s)	DA (cm2/s)	Particulate Emission Factor (m3/kg)	Volatilization Factor (m3/kg)	Ingestion SL TR=1E-06 (mg/kg)	Dermal SL TR=1E-06 (mg/kg)	Inhalation SL TR=1E-06 (mg/kg)	Carcinogenic SL TR=1E-06 (mg/kg)	Ingestion SL Child THQ=1 (mg/kg)	Dermal SL Child THQ=1 (mg/kg)	Inhalation SL Child THQ=1 (mg/kg)	Noncarcinogenic SL Child THI=1 (mg/kg)	Ingestion SL Adult THQ=1 (mg/kg)	Dermal SL Adult THQ=1 (mg/kg)	Inhalation SL Adult THQ=1 (mg/kg)	Noncarcinogenic SL Adult THI=1 (mg/kg)	Screening Level (mg/kg)
Acenaphthene	83-32-9	No	Yes	Organics	-		-		0.06	I	-		1	0.13	1	-	3.9	5030	30.2	0.000184	0.00752	PHYSPROP	552.15	PHYSPROP	803.15	YAWS	PAH	0.0506	8.33e-06	6.72e-07	1360000000	141000	-	-	-	-	329000	1060000	-	251000	3500000	6380000	-	2260000	2.51E+05 nc max
Acenaphthylene	208-96-8	No	Yes	Organics	-		-		-		-		1	0.13	1	-	16.1	5030	30.2	0.000114	0.00466	PHYSPROP	553.15	PHYSPROP	792	YAWS	PAH	0.045	6.98e-06	3.7e-07	1360000000	189000	-	-	-	-	-	-	-	-	-	-	-	-
Anthracene	120-12-7	No	Yes	Organics	-		-		0.3	I	-		1	0.13	1	-	0.0434	16400	98.2	5.56e-05	0.00227	PHYSPROP	613.05	PHYSPROP	873	YAWS	PAH	0.039	7.85e-06	4.85e-08	1360000000	523000	-	-	-	-	1640000	5320000	-	1260000	17500000	31900000	-	11300000	1.26E+06 nc max
Benz[a]anthracene	56-55-3	Yes	Yes	Organics	0.1	E	6e-05	E	-		-		1	0.13	1	-	0.0094	177000	1060	1.2e-05	0.000491	PHYSPROP	710.75	PHYSPROP	979	YAWS	PAH	0.0261	6.75e-06	6.83e-10	1360000000	4410000	107	321	20800	80.1	-	-	-	-	-	-	-	-	8.01E+01 ca
Benzo[a]pyrene	50-32-8	Yes	No	Organics	1	I	0.0006	I	0.0003	I	2e-06	I	1	0.13	1	-	0.00162	587000	-	4.57e-07	1.87e-05	PHYSPROP	768.15	PHYSPROP	969.27	EPA 2001 Fact Sheet	PAH	0.0255	6.58e-06	-	1360000000	-	10.7	32.1	643000	8.04	1640	5320	794000	1250	17500	31900	794000	11200	8.04E+00 ca
Benzo[b]fluoranthene	205-99-2	Yes	No	Organics	0.1	E	6e-05	E	-		-		1	0.13	1	-	0.0015	599000	-	6.57e-07	2.69e-05	PHYSPROP	715.9	EPI	969.27	EPA 2001 Fact Sheet	PAH	0.025	6.43e-06	-	1360000000	-	107	321	6430000	80.4	-	-	-	-	-	-	-	-	8.04E+01 ca
Benzo[g,h,i]perylene	191-24-2	No	No	Organics	-		-		-		-		1	0.13	1	-	0.00026	1950000	-	3.31e-07	1.35e-05	PHYSPROP	759.46	EPI	1092.51	Jobak Method	PAH	0.0239	6.09e-06	-	1360000000	-	-	-	-	-	-	-	-	-	-	-	-	-
Benzo[k]fluoranthene	207-08-9	Yes	No	Organics	0.01	E	6e-06	E	-		-		1	0.13	1	-	0.0008	587000	-	5.84e-07	2.39e-05	PHYSPROP	753.15	PHYSPROP	1019.7	EPA 2001 Fact Sheet	PAH	0.025	6.43e-06	-	1360000000	-	1070	3210	64300000	804	-	-	-	-	-	-	-	-	8.04E+02 ca
Chrysene	218-01-9	Yes	No	Organics	0.001	E	6e-07	E	-		-		1	0.13	1	-	0.002	181000	-	5.23e-06	0.000214	PHYSPROP	721.15	PHYSPROP	979	YAWS	PAH	0.0261	6.75e-06	-	1360000000	-	10700	32100	643000000	8040	-	-	-	-	-	-	-	-	8.04E+03 ca
Dibenz[a,h]anthracene	53-70-3	Yes	No	Organics	1	E	0.0006	E	-		-		1	0.13	1	-	0.00249	1910000	-	1.41e-07	5.76e-06	EPI	797.15	PHYSPROP	990.41	EPA 2001 Fact Sheet	PAH	0.0236	6.02e-06	-	1360000000	-	10.7	32.1	643000	8.04	-	-	-	-	-	-	-	-	8.04E+00 ca
Fluoranthene	206-44-0	No	No	Organics	-		-		0.04	I	-		1	0.13	1	-	0.26	55500	-	8.86e-06	0.000362	PHYSPROP	657.15	PHYSPROP	905	YAWS	PAH	0.0276	7.18e-06	-	1360000000	-	-	-	-	-	219000	710000	-	167000	2340000	4260000	-	1510000	1.67E+05 nc max
Fluorene	86-73-7	No	Yes	Organics	-		-		0.04	I	-		1	0.13	1	-	1.69	9160	55	9.62e-05	0.00393	PHYSPROP	568.15	PHYSPROP	826	YAWS	PAH	0.044	7.89e-06	1.68e-07	1360000000	281000	-	-	-	-	219000	710000	-	167000	2340000	4260000	-	1510000	1.67E+05 nc max
Indeno[1,2,3-cd]pyrene	193-39-5	Yes	No	Organics	0.1	E	6e-05	E	-		-		1	0.13	1	-	0.00019	1950000	-	3.48e-07	1.42e-05	PHYSPROP	809.15	PHYSPROP	1078.24	EPA 2001 Fact Sheet	PAH	0.0247	6.37e-06	-	1360000000	-	107	321	6430000	80.4	-	-	-	-	-	-	-	-	8.04E+01 ca
Methylnaphthalene, 2-	91-57-6	No	Yes	Organics	-		-		0.004	I	-		1	0.13	1	-	24.6	2480	14.9	0.000518	0.0212	PHYSPROP	514.25	PHYSPROP	761	CRC	PAH	0.0524	7.78e-06	3.95e-06	1360000000	58000	-	-	-	-	21900	71000	-	16700	234000	426000	-	151000	1.67E+04 nc
Naphthalene	91-20-3	No	Yes	Organics	0.12	C	3.4e-05	C	0.02	I	0.003	I	1	0.13	1	-	31	1540	9.26	0.00044	0.018	PHYSPROP	491.05	PHYSPROP	748.3	CRC	PAH	0.0605	8.38e-06	6.2e-06	1360000000	46300	406	1110	1070	232	110000	355000	40600	27300	1170000	2130000	40600	38500	2.32E+02 ca
Perylene	198-55-0	No	No	Organics	-		-		-		-		1	0.13	1	-	0.0004	599000	-	3.65e-06	0.000149	EPI	715.9	EPI	-		PAH	0.0255	6.58e-06	-	1360000000	-	-	-	-	-	-	-	-	-	-	-	-	-
Phenanthrene	85-01-8	No	Yes	Organics	-		-		-		-		1	0.13	1	-	1.15	16700	100	4.23e-05	0.00173	PHYSPROP	613.15	PHYSPROP	869	YAWS	PAH	0.0345	6.69e-06	3.21e-08	1360000000	643000	-	-	-	-	-	-	-	-	-	-	-	-
Pyrene	129-00-0	No	Yes	Organics	-		-		0.03	I	-		1	0.13	1	-	0.135	54300	326	1.19e-05	0.000487	PHYSPROP	677.15	PHYSPROP	936	YAWS	PAH	0.0278	7.25e-06	2.35e-09	1360000000	2380000	-	-	-	-	164000	532000	-	126000	1750000	3190000	-	1130000	1.26E+05 nc max
